# Supplementary material for: Determination of the Role and Active Sites of PKC-Delta-Like from Lamprey in Innate Immunity
Source: MDPI journal article supplement (doi:10.3390/ijms20133357), 2019-07-09
Supplement: s1 [file s1]

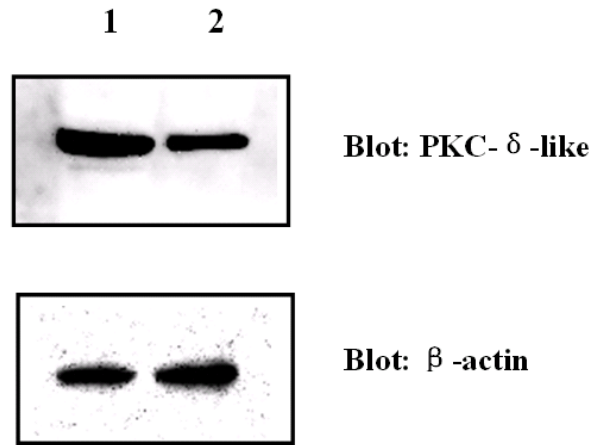

**Figure S1** Expression of PKC- $\delta$ -like in the supraneural body and leukocytes of *L. japonica*. Lane 1 is the cell lysate of the supraneural body; lane 2 is the cell lysate of the leukocytes.

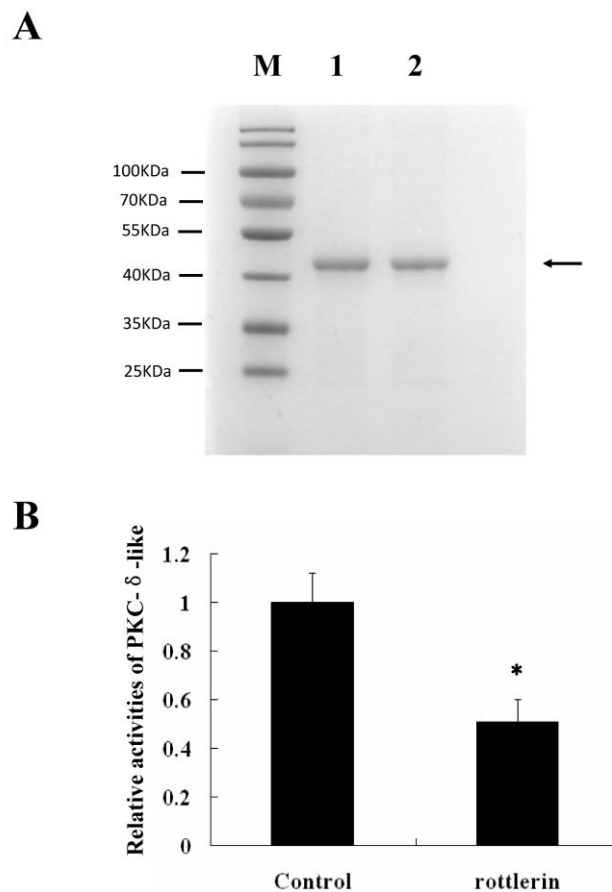

**Figure S2** Activity assay of PKC- $\delta$ -like-CF treated without or with rottlerin in vitro. (A) Expression and purification of PKC- $\delta$ -like-CF recombinant protein. The recombinant proteins were expressed in *E. coli* *BL21* and analyzed through SDS-PAGE. M, protein marker; lane 1 and lane 2, purified PKC- $\delta$ -like-CF recombinant protein. (B) Activity assay of PKC- $\delta$ -like-CF treated without or with rottlerin (10  $\mu$ mol/L). The asterisk indicates  $p < 0.05$ .

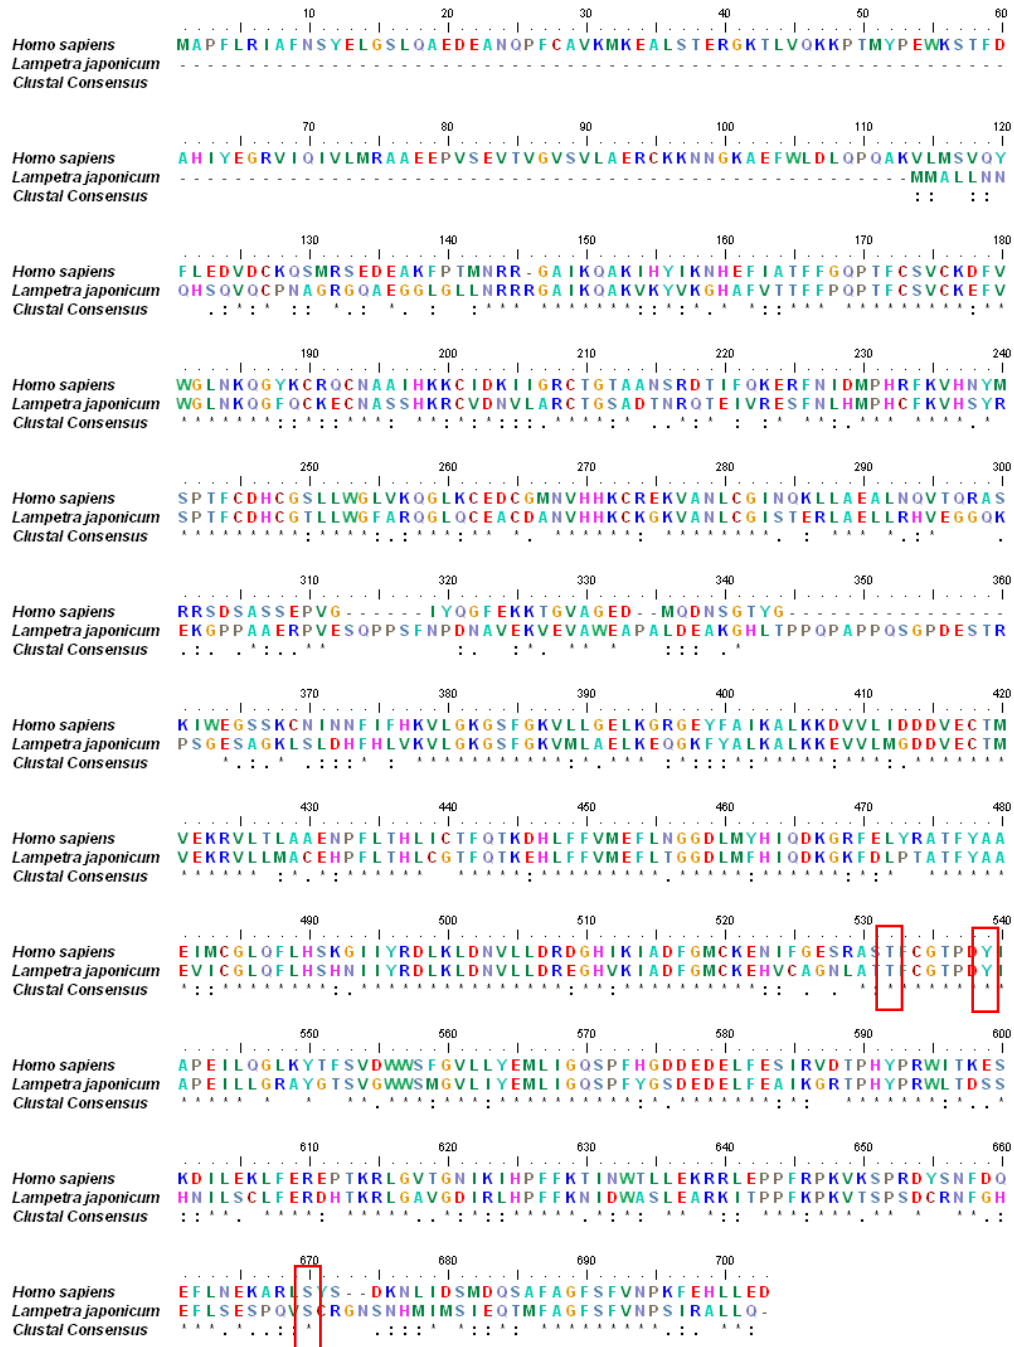

**Figure S3** Sequence alignment of PKC- $\delta$ -like with human PKC- $\delta$ . The following accession numbers of the amino acid sequences were extracted from the NCBI protein database: *Homo sapiens*: NP\_006245; *Lampetra japonicum*: KX943554. The red boxes marked the active sites.
